# Supplementary material for: Developmental Biology and Identification of a Garden Pest, Otiorhynchus (Podoropelmus) smreczynskii Cmoluch, 1968 (Coleoptera, Curculionidae, Entiminae), with Comments on Its Origin and Distribution
Source: MDPI journal article supplement (doi:10.3390/insects14040360), 2023-04-04
Supplement: s1 [file s1]

## Supplementary file S2.

### Detailed results of measurements of adults of *O. smreczynskii* (48 exx.) and *O. rotundus* (30 exx.)

| Species                      | Deposit. | sex | Locality       | latitude | longitude | Date       | leg./det.  | abdomen length (A) | abdomen width (B) | thorax length (C) | thorax width (D) | head and rostrum length (E) | head width (F) | first tibia length (G) | funiculus and clava (H) | length of the body (I) | A/B         | C/D         |
|------------------------------|----------|-----|----------------|----------|-----------|------------|------------|--------------------|-------------------|-------------------|------------------|-----------------------------|----------------|------------------------|-------------------------|------------------------|-------------|-------------|
| <i>O. smreczynskii</i> Cmol. | UMCS     | f   | holotyp        | N51.2610 | E22.5150  | 16.09.1965 | Z. Cmoluch | 3,35               | 2,80              | 1,40              | 1,70             | 1,25                        | 0,95           | 1,50                   | 1,60                    | 5,40                   | 1,1964285   | 0,8235294   |
| <i>O. smreczynskii</i> Cmol. | UMCS     | f   | Poland, Lublin | N51.2610 | E22.5150  | 11.06.1973 | Z. Cmoluch | 3,50               | 2,95              | 1,65              | 1,75             | 1,25                        | 1,00           | 1,55                   | 2,00                    | 5,10                   | 1,186440678 | 0,942857143 |
| <i>O. smreczynskii</i> Cmol. | UMCS     | f   | Poland, Lublin | N51.2610 | E22.5150  | 15.07.1976 | Z. Cmoluch | 3,00               | 2,50              | 1,35              | 1,45             | 1,20                        | 0,90           | 1,35                   | 1,55                    | 5,00                   | 1,2         | 0,931034483 |
| <i>O. smreczynskii</i> Cmol. | UMCS     | f   | Poland, Lublin | N51.2610 | E22.5150  | 15.07.1976 | Z. Cmoluch | 3,05               | 2,50              | 1,45              | 1,50             | 1,15                        | 0,85           | 1,30                   | 1,60                    | 5,10                   | 1,22        | 0,966666667 |
| <i>O. smreczynskii</i> Cmol. | UMCS     | f   | Poland, Lublin | N51.2610 | E22.5150  | 15.07.1976 | Z. Cmoluch | 3,00               | 2,50              | 1,20              | 1,45             | 1,20                        | 0,85           | 1,25                   | 1,50                    | 5,50                   | 1,2         | 0,827586207 |
| <i>O. smreczynskii</i> Cmol. | UMCS     | f   | Poland, Lublin | N51.2610 | E22.5150  | 15.07.1976 | Z. Cmoluch | 3,20               | 2,50              | 1,30              | 1,45             | 1,20                        | 0,85           | 1,45                   | 1,70                    | 5,00                   | 1,28        | 0,896551724 |
| <i>O. smreczynskii</i> Cmol. | UMCS     | f   | Poland, Lublin | N51.2610 | E22.5150  | 15.07.1976 | Z. Cmoluch | 2,90               | 2,25              | 1,30              | 1,40             | 1,10                        | 0,85           | 1,30                   | 1,50                    | 4,50                   | 1,288888889 | 0,928571429 |
| <i>O. smreczynskii</i> Cmol. | UMCS     | f   | Poland, Lublin | N51.2610 | E22.5150  | 15.07.1976 | Z. Cmoluch | 3,05               | 2,50              | 1,35              | 1,40             | 1,15                        | 0,80           | 1,35                   | 1,80                    | 4,90                   | 1,22        | 0,964285714 |
| <i>O. smreczynskii</i> Cmol. | UMCS     | f   | Poland, Lublin | N51.2610 | E22.5150  | 15.07.1976 | Z. Cmoluch | 3,00               | 2,70              | 1,40              | 1,55             | 1,15                        | 0,90           | 1,45                   | 1,50                    | 5,00                   | 1,111111111 | 0,903225806 |
| <i>O. smreczynskii</i> Cmol. | UMCS     | f   | Poland, Lublin | N51.2610 | E22.5150  | 15.07.1976 | Z. Cmoluch | 3,05               | 2,50              | 1,40              | 1,55             | 1,25                        | 0,90           | 1,35                   | 1,70                    | 5,00                   | 1,22        | 0,903225806 |
| <i>O. smreczynskii</i> Cmol. | UMCS     | f   | Poland, Lublin | N51.2610 | E22.5150  | 17.07.1979 | Z. Cmoluch | 3,00               | 2,40              | 1,25              | 1,35             | 1,10                        | 0,80           | 1,45                   | 1,50                    | 4,90                   | 1,25        | 0,925925926 |
| <i>O. smreczynskii</i> Cmol. | UMCS     | f   | Poland, Lublin | N51.2610 | E22.5150  | 17.07.1979 | Z. Cmoluch | 2,80               | 2,40              | 1,25              | 1,25             | 1,00                        | 0,85           | 1,35                   | 1,50                    | 5,00                   | 1,166666667 | 1           |
| <i>O. smreczynskii</i> Cmol. | UMCS     | f   | Poland, Lublin | N51.2610 | E22.5150  | 17.07.1979 | Z. Cmoluch | 2,75               | 2,35              | 1,25              | 1,30             | 1,05                        | 0,75           | 1,00                   | 1,30                    | 4,90                   | 1,170212766 | 0,961538462 |
| <i>O. smreczynskii</i> Cmol. | UMCS     | f   | Poland, Lublin | N51.2610 | E22.5150  | 17.07.1979 | Z. Cmoluch | 3,15               | 2,40              | 1,35              | 1,50             | 1,10                        | 0,85           | 1,40                   | 1,35                    | 5,00                   | 1,3125      | 0,9         |
| <i>O. smreczynskii</i> Cmol. | UMCS     | f   | Poland, Lublin | N51.2610 | E22.5150  | 17.07.1979 | Z. Cmoluch | 3,00               | 2,50              | 1,40              | 1,50             | 1,15                        | 0,90           | 1,35                   | 1,50                    | 5,10                   | 1,2         | 0,933333333 |
| <i>O. smreczynskii</i> Cmol. | UMCS     | f   | Poland, Lublin | N51.2610 | E22.5150  | 17.07.1979 | Z. Cmoluch | 2,75               | 2,40              | 1,25              | 1,45             | 1,20                        | 0,90           | 1,35                   | 1,50                    | 4,90                   | 1,145833333 | 0,862068966 |
| <i>O. smreczynskii</i> Cmol. | UMCS     | f   | Poland, Lublin | N51.2610 | E22.5150  | 17.07.1979 | Z. Cmoluch | 3,15               | 2,50              | 1,35              | 1,45             | 1,25                        | 0,85           | 1,45                   | 1,50                    | 5,00                   | 1,26        | 0,931034483 |
| <i>O. smreczynskii</i> Cmol. | UMCS     | f   | Poland, Lublin | N51.2610 | E22.5150  | 17.07.1979 | Z. Cmoluch | 3,00               | 2,55              | 1,35              | 1,50             | 1,25                        | 0,95           | 1,30                   | 1,50                    | 5,20                   | 1,176470588 | 0,9         |
| <i>O. smreczynskii</i> Cmol. | UMCS     | f   | Poland, Lublin | N51.2610 | E22.5150  | 17.07.1979 | Z. Cmoluch | 3,25               | 2,50              | 1,40              | 1,50             | 1,05                        | 0,85           | 1,40                   | 1,60                    | 5,10                   | 1,3         | 0,933333333 |
| <i>O. smreczynskii</i> Cmol. | UMCS     | f   | Poland, Lublin | N51.2610 | E22.5150  | 17.07.1979 | Z. Cmoluch | 2,65               | 2,25              | 1,15              | 1,30             | 1,10                        | 0,80           | 1,25                   | 1,60                    | 4,40                   | 1,177777778 | 0,884615385 |
| <i>O. smreczynskii</i> Cmol. | UMCS     | f   | Poland, Lublin | N51.2610 | E22.5150  | 17.07.1979 | Z. Cmoluch | 3,75               | 2,70              | 1,50              | 1,65             | 1,20                        | 0,90           | 1,50                   | 1,75                    | 5,40                   | 1,388888889 | 0,909090909 |
| <i>O. smreczynskii</i> Cmol. | UMCS     | f   | Poland, Lublin | N51.2610 | E22.5150  | 17.07.1979 | Z. Cmoluch | 3,25               | 2,50              | 1,45              | 1,50             | 1,10                        | 0,85           | 1,50                   | 1,55                    | 5,10                   | 1,3         | 0,966666667 |
| <i>O. smreczynskii</i> Cmol. | UMCS     | f   | Poland, Lublin | N51.2610 | E22.5150  | 17.07.1979 | Z. Cmoluch | 3,25               | 2,55              | 1,55              | 1,50             | 1,25                        | 0,90           | 1,25                   | 1,50                    | 5,20                   | 1,274509804 | 1,033333333 |
| <i>O. smreczynskii</i> Cmol. | UMCS     | f   | Poland, Lublin | N51.2610 | E22.5150  | 17.07.1979 | Z. Cmoluch | 2,90               | 2,40              | 1,40              | 1,40             | 1,25                        | 0,90           | 1,35                   | 1,50                    | 4,70                   | 1,208333333 | 1           |

|                                 |       |   |                                             |                  |                 |            |            |      |      |      |      |      |      |      |      |      |             |             |
|---------------------------------|-------|---|---------------------------------------------|------------------|-----------------|------------|------------|------|------|------|------|------|------|------|------|------|-------------|-------------|
| <i>O. smreczynskii</i><br>Cmol. | UMCS  | f | Poland, Lublin                              | N51.2610E        | E22.5150        | 17.07.1979 | Z. Cmoluch | 3,25 | 2,50 | 1,35 | 1,40 | 1,05 | 0,85 | 1,45 | 1,50 | 5,10 | 1,3         | 0,964285714 |
| <i>O. smreczynskii</i><br>Cmol. | UMCS  | f | Poland, Lublin                              | N51.2610E        | E22.5150        | 17.07.1979 | Z. Cmoluch | 3,40 | 2,85 | 1,50 | 1,60 | 1,05 | 0,90 | 1,50 | 1,70 | 5,30 | 1,192982456 | 0,9375      |
| <i>O. smreczynskii</i><br>Cmol. | UMCS  | f | Poland, Lublin                              | N51.2610         | E22.5150        | 17.07.1979 | Z. Cmoluch | 3,10 | 2,55 | 1,35 | 1,50 | 1,05 | 0,90 | 1,45 | 1,70 | 5,00 | 1,215686275 | 0,9         |
| <i>O. smreczynskii</i><br>Cmol. | UMCS  | f | Poland, Lublin                              | N51.2610         | E22.5150        | 17.07.1979 | Z. Cmoluch | 3,25 | 2,55 | 1,45 | 1,55 | 1,20 | 0,95 | 1,50 | 1,55 | 5,00 | 1,274509804 | 0,935483871 |
| <i>O. smreczynskii</i><br>Cmol. | UMCS  | f | Poland, Lublin                              | N51.2610         | E22.5150        | 17.07.1979 | Z. Cmoluch | 3,00 | 2,50 | 1,50 | 1,55 | 1,25 | 0,95 | 1,50 | 1,60 | 4,90 | 1,2         | 0,967741935 |
| <i>O. smreczynskii</i><br>Cmol. | UMCS  | f | Poland, Lublin                              | N51.2430         | E22.54043<br>2  | 10.06.1983 | B. Staniec | 3,50 | 2,85 | 1,60 | 1,65 | 1,05 | 1,00 | 1,55 | 1,85 | 5,30 | 1,228070175 | 0,96969697  |
| <i>O. smreczynskii</i><br>Cmol. | UMCS  | f | Poland, Lublin                              | N51.2118         | E22.5715        | 10.06.2021 | R. Gosik   | 2,95 | 2,40 | 1,40 | 1,45 | 1,25 | 0,85 | 1,35 | 1,60 | 4,90 | 1,229166667 | 0,965517241 |
| <i>O. smreczynskii</i><br>Cmol. | UMCS  | f | Poland, Lublin                              | N51.2118         | E22.5715        | 10.06.2021 | R. Gosik   | 3,25 | 2,70 | 1,50 | 1,50 | 1,15 | 0,95 | 1,40 | 1,45 | 5,00 | 1,203703704 | 1           |
| <i>O. smreczynskii</i><br>Cmol. | UMCS  | f | Poland, Lublin                              | N51.2118         | E22.5715        | 10.06.2021 | R. Gosik   | 3,05 | 2,50 | 1,45 | 1,50 | 1,05 | 0,85 | 1,40 | 1,50 | 4,90 | 1,22        | 0,966666667 |
| <i>O. smreczynskii</i><br>Cmol. | UMCS  | f | Poland, Lublin                              | N51.2118         | E22.5715        | 21.07.2021 | R. Gosik   | 2,85 | 2,35 | 1,15 | 1,35 | 1,00 | 0,85 | 1,15 | 1,65 | 4,70 | 1,212765957 | 0,851851852 |
| <i>O. smreczynskii</i><br>Cmol. | UMCS  | f | Poland, Lublin                              | N51.2118         | E22.5715        | 21.07.2021 | R. Gosik   | 3,35 | 2,65 | 1,50 | 1,55 | 1,00 | 0,90 | 1,35 | 1,55 | 5,10 | 1,264150943 | 0,967741935 |
| <i>O. smreczynskii</i><br>Cmol. | UMCS  | f | Poland, Lublin                              | N51.2118         | E22.5715        | 21.07.2021 | R. Gosik   | 2,85 | 2,35 | 1,25 | 1,35 | 0,95 | 0,80 | 1,15 | 1,40 | 4,40 | 1,212765957 | 0,925925926 |
| <i>O. smreczynskii</i><br>Cmol. | UMCS  | f | Germany, Berlin                             | no data          | no data         | 20.08.1968 | Z. Cmoluch | 3,15 | 2,70 | 1,25 | 1,50 | 1,35 | 0,90 | 1,60 | 1,65 | 5,30 | 1,166666667 | 0,833333333 |
| <i>O. smreczynskii</i><br>Cmol. | UMCS  | f | Germany, Berlin                             | no data          | no data         | 20.08.1968 | Z. Cmoluch | 3,45 | 2,70 | 1,60 | 1,65 | 1,25 | 0,95 | 1,55 | 1,60 | 5,40 | 1,277777778 | 0,96969697  |
| <i>O. smreczynskii</i><br>Cmol. | UMCS  | f | Germany, Berlin                             | no data          | no data         | 20.08.1968 | Z. Cmoluch | 2,90 | 2,25 | 1,30 | 1,30 | 1,05 | 0,80 | 1,55 | 1,40 | 4,80 | 1,288888889 | 1           |
| <i>O. smreczynskii</i><br>Cmol. | UMCS  | f | Germany, Berlin                             | no data          | no data         | 20.08.1968 | Z. Cmoluch | 3,25 | 2,70 | 1,50 | 1,50 | 1,25 | 0,90 | 1,40 | 1,55 | 5,10 | 1,203703704 | 1           |
| <i>O. smreczynskii</i><br>Cmol. | CURCI | f | Germany, Hannover-<br>Herrenhausen          | N52°23'40"       | E9°42'15"       | 15.05.1989 | P. Sprick  | 3    | 2,45 | 1,40 | 1,50 | 1,00 | 0,85 | 1,40 | 1,50 | 4,70 | 1,224489796 | 0,933333333 |
| <i>O. smreczynskii</i><br>Cmol. | CURCI | f | Germany, Hannover,<br>allotment garden area | no data          | no data         | 02.09.1986 | P. Sprick  | 3,2  | 2,55 | 1,40 | 1,50 | 1,10 | 0,90 | 1,40 | 1,75 | 5,00 | 1,254901961 | 0,933333333 |
| <i>O. smreczynskii</i><br>Cmol. | CURCI | f | Germany, Hannover-<br>Herrenhausen          | N52°23'34"       | E9°42'02,<br>7" | 19.08.1988 | P. Sprick  | 2,5  | 2,05 | 1,10 | 1,25 | 0,90 | 0,75 | 1,10 | 1,30 | 4,00 | 1,219512195 | 0,88        |
| <i>O. smreczynskii</i><br>Cmol. | CURCI | f | Germany, Hannover-<br>Burg/Ledeburg         | N52°24'44"       | E9°41'56"       | 26.06.1996 | P. Sprick  | 3,15 | 2,60 | 1,40 | 1,55 | 1,10 | 0,95 | 1,50 | 1,70 | 5,00 | 1,211538462 | 0,903225806 |
| <i>O. smreczynskii</i><br>Cmol. | CURCI | f | Germany, Hannover-<br>Herrenhausen          | N52°23'40"       | E9°42'15"       | 15.05.1989 | P. Sprick  | 2,9  | 2,35 | 1,25 | 1,40 | 1,05 | 0,85 | 1,30 | 1,50 | 4,50 | 1,234042553 | 0,892857143 |
| <i>O. smreczynskii</i><br>Cmol. | CURCI | f | Germany, Hannover-<br>Herrenhausen          | N52°23'34"       | E9°42'02,<br>7" | 19.08.1988 | P. Sprick  | 2,7  | 2,40 | 1,30 | 1,40 | 1,00 | 0,85 | 1,30 | 1,50 | 4,40 | 1,125       | 0,928571429 |
| <i>O. smreczynskii</i><br>Cmol. | CURCI | f | Germany,<br>Braunschweig, JKI area          | N52°16'34"       | E10°33'51<br>"  | 20.06.2008 | P. Sprick  | 3,05 | 2,50 | 1,35 | 1,45 | 1,05 | 0,85 | 1,30 | 1,65 | 4,90 | 1,22        | 0,931034483 |
| <i>O. smreczynskii</i><br>Cmol. | CURCI | f | Germany, Hannover-<br>Herrenhausen          | N52°23'40"       | E9°42'15"       | 06.08.1989 | P. Sprick  | 2,85 | 2,30 | 1,25 | 1,40 | 1,00 | 0,82 | 1,30 | 1,50 | 4,55 | 1,239130435 | 0,892857143 |
| <i>O. smreczynskii</i><br>Cmol. | CURCI | f | Germany, Hannover-<br>Herrenhausen          | N52°23'40"       | E9°42'15"       | 18.05.1989 | P. Sprick  | 3,3  | 2,60 | 1,45 | 1,55 | 1,10 | 0,90 | 1,50 | 1,50 | 5,20 | 1,269230769 | 0,935483871 |
| <i>O. smreczynskii</i><br>Cmol. | CURCI | f | Germany, Aerzen-<br>Königsförde             | N52°03,58,<br>5' | E9°16'18"       | 24.08.2021 | P. Sprick  | 3,15 | 2,55 | 1,40 | 1,60 | 1,10 | 0,90 | 1,50 | 1,80 | 4,80 | 1,235294118 | 0,875       |
| <i>O. smreczynskii</i><br>Cmol. | CURCI | f | Germany, Hannover-<br>Steintormasch         | N52°22'58"       | E9°42'31"       | 12.07.2021 | P. Sprick  | 3,1  | 2,70 | 1,45 | 1,70 | 1,05 | 0,95 | 1,42 | 1,50 | 5,00 | 1,148148148 | 0,852941176 |
| <i>O. smreczynskii</i><br>Cmol. | CURCI | f | Germany, Hannover-<br>Steintormasch         | N52°22'58"       | E9°42'31"       | 12.07.2021 | P. Sprick  | 3,05 | 2,60 | 1,40 | 1,55 | 1,10 | 0,90 | 1,35 | 1,75 | 4,90 | 1,173076923 | 0,903225806 |

|                           |      |   |                 |            |            |            |            |      |      |      |      |      |      |      |      |      |             |             |
|---------------------------|------|---|-----------------|------------|------------|------------|------------|------|------|------|------|------|------|------|------|------|-------------|-------------|
| <i>O. rotundus</i> Marsh. | UMCS | m | Poland, Lublin  | N51.2610   | E22.5150   | 13.07.1971 | Z. Cmoluch | 2,50 | 2,00 | 1,25 | 1,25 | 0,95 | 0,75 | 1,25 | 1,35 | 4,00 | 1,25        | 1           |
| <i>O. rotundus</i> Marsh. | UMCS | m | Poland, Lublin  | N51.2610   | E22.5150   | 11.06.1973 | Z. Cmoluch | 2,75 | 2,20 | 1,20 | 1,40 | 1,00 | 0,80 | 1,35 | 1,50 | 4,50 | 1,25        | 0,857142857 |
| <i>O. rotundus</i> Marsh. | UMCS | m | Poland, Lublin  | N51.2610   | E22.5150   | 11.06.1973 | Z. Cmoluch | 2,45 | 1,90 | 1,05 | 1,20 | 1,00 | 0,75 | 1,20 | 1,35 | 4,20 | 1,289473684 | 0,875       |
| <i>O. rotundus</i> Marsh. | UMCS | f | Poland, Lublin  | N51.2610   | E22.5150   | 17.07.1979 | Z. Cmoluch | 2,75 | 2,35 | 1,25 | 1,50 | 0,65 | 0,75 | 1,30 | 1,50 | 4,40 | 1,170212766 | 0,833333333 |
| <i>O. rotundus</i> Marsh. | UMCS | f | Poland, Lublin  | N51.2610   | E22.5150   | 17.07.1979 | Z. Cmoluch | 2,80 | 2,30 | 1,35 | 1,45 | 1,05 | 0,90 | 1,55 | 1,65 | 4,40 | 1,217391304 | 0,931034483 |
| <i>O. rotundus</i> Marsh. | UMCS | f | Poland, Lublin  | N51.2610   | E22.5150   | 17.07.1979 | Z. Cmoluch | 2,50 | 2,05 | 1,25 | 1,35 | 0,90 | 0,75 | 1,25 | 1,40 | 4,30 | 1,219512195 | 0,925925926 |
| <i>O. rotundus</i> Marsh. | UMCS | f | Poland, Lublin  | N51.2610   | E22.5150   | 17.07.1979 | Z. Cmoluch | 2,80 | 2,30 | 1,45 | 1,50 | 1,00 | 0,90 | 1,45 | 1,50 | 4,20 | 1,217391304 | 0,966666667 |
| <i>O. rotundus</i> Marsh. | UMCS | m | Poland, Lublin  | N51.2610   | E22.5150   | 17.07.1979 | Z. Cmoluch | 2,45 | 2,25 | 1,10 | 1,05 | 0,95 | 0,75 | 1,25 | 1,25 | 4,20 | 1,088888889 | 1,047619048 |
| <i>O. rotundus</i> Marsh. | UMCS | m | Poland, Lublin  | N51.2610   | E22.5150   | 17.07.1979 | Z. Cmoluch | 2,45 | 2,00 | 1,25 | 1,35 | 1,05 | 0,80 | 0,90 | 1,25 | 4,30 | 1,225       | 0,925925926 |
| <i>O. rotundus</i> Marsh. | UMCS | m | Poland, Lublin  | N51.2610   | E22.5150   | 17.07.1979 | Z. Cmoluch | 2,50 | 2,20 | 1,25 | 1,30 | 1,05 | 0,75 | 1,25 | 1,20 | 4,30 | 1,136363636 | 0,961538462 |
| <i>O. rotundus</i> Marsh. | UMCS | m | Poland, Lublin  | N51.2610   | E22.5150   | 17.07.1979 | Z. Cmoluch | 2,75 | 2,25 | 1,35 | 1,45 | 0,85 | 0,85 | 1,25 | 1,40 | 4,50 | 1,222222222 | 0,931034483 |
| <i>O. rotundus</i> Marsh. | UMCS | f | Poland, Lublin  | N51.2610   | E22.5150   | 17.07.1979 | Z. Cmoluch | 3,00 | 2,50 | 1,25 | 1,50 | 1,00 | 0,85 | 1,45 | 1,50 | 4,50 | 1,2         | 0,833333333 |
| <i>O. rotundus</i> Marsh. | UMCS | f | Poland, Lublin  | N51.2610   | E22.5150   | 17.07.1979 | Z. Cmoluch | 3,10 | 2,45 | 1,45 | 1,45 | 1,05 | 0,90 | 1,45 | 1,55 | 4,50 | 1,265306122 | 1           |
| <i>O. rotundus</i> Marsh. | UMCS | f | Poland, Lublin  | N51.2610   | E22.5150   | 17.07.1979 | Z. Cmoluch | 2,50 | 2,20 | 1,30 | 1,15 | 1,05 | 0,80 | 1,25 | 1,35 | 4,30 | 1,136363636 | 1,130434783 |
| <i>O. rotundus</i> Marsh. | UMCS | m | Poland, Lublin  | N51.2610   | E22.5150   | 17.07.1979 | Z. Cmoluch | 2,50 | 2,15 | 1,40 | 1,45 | 1,20 | 0,80 | 1,35 | 1,40 | 4,20 | 1,162790698 | 0,965517241 |
| <i>O. rotundus</i> Marsh. | UMCS | f | Poland, Milejów | N51.243042 | E22.540432 | 10.06.1983 | B. Staniec | 3,25 | 2,40 | 1,35 | 1,40 | 1,10 | 0,80 | 1,50 | 1,50 | 4,70 | 1,354166667 | 0,964285714 |
| <i>O. rotundus</i> Marsh. | UMCS | f | Poland, Milejów | N51.243042 | E22.540432 | 10.06.1983 | B. Staniec | 2,65 | 2,15 | 1,25 | 1,40 | 1,20 | 0,80 | 1,40 | 1,50 | 4,40 | 1,23255814  | 0,892857143 |
| <i>O. rotundus</i> Marsh. | UMCS | f | Poland, Gródek  | N50.80711  | E23.95661  | 20.07.2005 | R. Gosik   | 2,50 | 2,05 | 1,15 | 1,25 | 1,10 | 0,75 | 1,25 | 1,20 | 4,30 | 1,219512195 | 0,92        |
| <i>O. rotundus</i> Marsh. | UMCS | f | Poland, Gródek  | N50.80711  | E23.95661  | 20.07.2005 | R. Gosik   | 2,55 | 2,20 | 1,20 | 1,25 | 1,00 | 0,75 | 1,00 | 1,25 | 4,40 | 1,159090909 | 0,96        |
| <i>O. rotundus</i> Marsh. | UMCS | f | Poland, Gródek  | N50.80711  | E23.95661  | 20.07.2005 | R. Gosik   | 2,65 | 2,20 | 1,25 | 1,35 | 1,05 | 0,80 | 1,50 | 1,50 | 4,40 | 1,204545455 | 0,925925926 |
| <i>O. rotundus</i> Marsh. | UMCS | f | Poland, Gródek  | N50.80711  | E23.95661  | 09.06.2021 | R. Gosik   | 2,75 | 2,40 | 1,25 | 1,35 | 1,05 | 0,85 | 1,30 | 1,50 | 4,40 | 1,145833333 | 0,925925926 |
| <i>O. rotundus</i> Marsh. | UMCS | f | Poland, Gródek  | N50.80711  | E23.95661  | 09.06.2021 | R. Gosik   | 2,85 | 2,35 | 1,15 | 1,30 | 1,10 | 0,85 | 1,35 | 1,50 | 4,50 | 1,212765957 | 0,884615385 |
| <i>O. rotundus</i> Marsh. | UMCS | m | Poland, Gródek  | N50.80711  | E23.95661  | 09.06.2021 | R. Gosik   | 2,30 | 2,00 | 1,15 | 1,25 | 0,85 | 0,65 | 1,25 | 1,50 | 4,20 | 1,15        | 0,92        |
| <i>O. rotundus</i> Marsh. | UMCS | f | Poland, Gródek  | N50.80711  | E23.95661  | 09.06.2021 | R. Gosik   | 3,00 | 2,45 | 1,25 | 1,50 | 1,00 | 0,80 | 1,35 | 1,40 | 4,50 | 1,224489796 | 0,833333333 |
| <i>O. rotundus</i> Marsh. | UMCS | f | Poland, Gródek  | N50.80711  | E23.95661  | 09.06.2021 | R. Gosik   | 3,00 | 2,55 | 1,20 | 1,50 | 1,00 | 0,80 | 1,30 | 1,35 | 4,50 | 1,176470588 | 0,8         |
| <i>O. rotundus</i> Marsh. | UMCS | f | Poland, Gródek  | N50.80711  | E23.95661  | 09.06.2021 | R. Gosik   | 3,25 | 2,50 | 1,15 | 1,50 | 1,10 | 0,85 | 1,30 | 1,50 | 4,70 | 1,3         | 0,766666667 |
| <i>O. rotundus</i> Marsh. | UMCS | m | Poland, Gródek  | N50.80711  | E23.95661  | 09.06.2021 | R. Gosik   | 2,40 | 2,00 | 1,10 | 1,30 | 1,00 | 0,65 | 1,25 | 1,35 | 4,10 | 1,2         | 0,846153846 |
| <i>O. rotundus</i> Marsh. | UMCS | f | Poland, Gródek  | N50.80711  | E23.95661  | 09.06.2021 | R. Gosik   | 2,80 | 2,30 | 1,25 | 1,35 | 1,05 | 0,85 | 1,20 | 1,50 | 4,20 | 1,217391304 | 0,925925926 |
| <i>O. rotundus</i> Marsh. | UMCS | f | Poland, Gródek  | N50.80711  | E23.95661  | 09.06.2021 | R. Gosik   | 2,85 | 2,40 | 1,25 | 1,50 | 1,05 | 0,70 | 1,25 | 1,50 | 4,30 | 1,1875      | 0,833333333 |

|                              |      |   |                |           |           |            |          |      |      |      |      |      |      |      |      |      |      |             |
|------------------------------|------|---|----------------|-----------|-----------|------------|----------|------|------|------|------|------|------|------|------|------|------|-------------|
| <i>O. rotundus</i><br>Marsh. | UMCS | f | Poland, Gródek | N50.80711 | E23.95661 | 09.06.2021 | R. Gosik | 2,30 | 2,00 | 1,30 | 1,40 | 1,10 | 0,80 | 1,25 | 1,55 | 4,10 | 1,15 | 0,928571429 |
|------------------------------|------|---|----------------|-----------|-----------|------------|----------|------|------|------|------|------|------|------|------|------|------|-------------|
