# Supplementary material for: Developmental Biology and Identification of a Garden Pest, Otiorhynchus (Podoropelmus) smreczynskii Cmoluch, 1968 (Coleoptera, Curculionidae, Entiminae), with Comments on Its Origin and Distribution
Source: MDPI journal article supplement (doi:10.3390/insects14040360), 2023-04-04
Supplement: s1 [file s1]

### Supplementary file S1.

List of *Otiorhynchus* specimens used for molecular study sorted by voucher code, species name, locality, host plant affiliation, *COI* haplotype name with GenBank accession number; and haplotype frequency.

| voucher code | Species                                | Locality                                                                                                 | Host plant                    | Haplotype name (NCBI accession number) | haplotype frequency |
|--------------|----------------------------------------|----------------------------------------------------------------------------------------------------------|-------------------------------|----------------------------------------|---------------------|
| 4633         | <i>Otiorhynchus smreczynskii</i> Cmol. | Poland, Skrzynice, N51.12245, E22.67538, 6.08.2017, lgt. R. Gosik                                        | <i>Ligustrum vulgare</i> L.   | smr1<br>(OQ382848)                     | 55                  |
| 4634         | <i>Otiorhynchus smreczynskii</i> Cmol. | Germany, Hannover, 30.06.2017, lgt. Stein Tormasch                                                       | <i>Lonicera pileata</i> Oliv. |                                        |                     |
| 4635         | <i>Otiorhynchus smreczynskii</i> Cmol. | Germany, Hannover, 30.07.2017, lgt. P. Sprick                                                            | <i>Lonicera pileata</i> Oliv. |                                        |                     |
| 4636         | <i>Otiorhynchus smreczynskii</i> Cmol. | Germany, Hannover, 30.07.2017, lgt. P. Sprick                                                            | <i>Lonicera pileata</i> Oliv. |                                        |                     |
| 4637         | <i>Otiorhynchus smreczynskii</i> Cmol. | Poland, Lublin, Botanic Garden, N51.26432, E22.51586, 29.07.2017, lgt. R. Gosik                          | <i>Ligustrum vulgare</i> L.   |                                        |                     |
| 4638         | <i>Otiorhynchus smreczynskii</i> Cmol. | Poland, Lublin, Botanic Garden, N51.26432, E22.51586, 29.07.2017, lgt. R. Gosik                          | <i>Syringa vulgaris</i> L.    |                                        |                     |
| 4639         | <i>Otiorhynchus smreczynskii</i> Cmol. | Poland, Lublin, Botanic Garden, N51.26432, E22.51586, 29.07.2017, lgt. R. Gosik                          | <i>Syringa vulgaris</i> L.    |                                        |                     |
| 4640         | <i>Otiorhynchus smreczynskii</i> Cmol. | Poland, Lublin, Botanic Garden, N51.26432, E22.51586, 29.07.2017, lgt. R. Gosik                          | <i>Syringa vulgaris</i> L.    |                                        |                     |
| 4641         | <i>Otiorhynchus smreczynskii</i> Cmol. | Poland, Lublin, Botanic Garden, N51.26432, E22.51586, 29.07.2017, lgt. R. Gosik                          | <i>Syringa vulgaris</i> L.    |                                        |                     |
| 6419         | <i>Otiorhynchus smreczynskii</i> Cmol. | Czechia, Bohemia or., Hradec Králove, Náměstí 5 května, N50 12.447 E15 49.384, 30.08.2022 lgt. J. Krátký | <i>Ligustrum vulgare</i> L.   |                                        |                     |
| 6420         | <i>Otiorhynchus smreczynskii</i> Cmol. | Czechia, Bohemia or., Hradec Králove, Náměstí 5 května, N50 12.447 E15 49.384, 30.08.2022 lgt. J. Krátký | <i>Ligustrum vulgare</i> L.   |                                        |                     |
| 6421         | <i>Otiorhynchus smreczynskii</i> Cmol. | Czechia, Bohemia or., Hradec Králove, Náměstí 5 května, N50 12.447 E15 49.384, 30.08.2022 lgt. J. Krátký | <i>Ligustrum vulgare</i> L.   |                                        |                     |
| 6422         | <i>Otiorhynchus smreczynskii</i> Cmol. | Czechia, Bohemia or., Hradec Králove, Náměstí 5 května, N50 12.447 E15 49.384, 30.08.2022 lgt. J. Krátký | <i>Ligustrum vulgare</i> L.   |                                        |                     |
| 6426         | <i>Otiorhynchus smreczynskii</i> Cmol. | Germany, Eberswalde, N52.844157 E13.806817, 4.08.2022, lgt. Jakob Jilg.                                  | <i>Lonicera pileata</i> Oliv. |                                        |                     |
| 6427         | <i>Otiorhynchus smreczynskii</i> Cmol. | Germany, Eberswalde, N52.844157 E13.806817, 4.08.2022, lgt. Jakob Jilg.                                  | <i>Lonicera pileata</i> Oliv. |                                        |                     |
| 6428         | <i>Otiorhynchus smreczynskii</i> Cmol. | Czechia, Bohemia C., Kostelec nad Labem, Havlíčkova 1117, 11.06.2022, P. Jansa lgt., Oklep               | <i>Ligustrum vulgare</i> L.   |                                        |                     |
| 6429         | <i>Otiorhynchus smreczynskii</i> Cmol. | Czechia, Bohemia C., Kostelec nad Labem, Havlíčkova 1117, 11.06.2022, P. Jansa lgt., Oklep               | <i>Ligustrum vulgare</i> L.   |                                        |                     |
| 6430         | <i>Otiorhynchus smreczynskii</i> Cmol. | Czechia, Bohemia C., Kostelec nad Labem, Havlíčkova 1117, 11.06.2022, P. Jansa lgt., Oklep               | <i>Ligustrum vulgare</i> L.   |                                        |                     |

|      |                                        |                                                                                                           |                                    |  |  |
|------|----------------------------------------|-----------------------------------------------------------------------------------------------------------|------------------------------------|--|--|
| 6431 | <i>Otiorhynchus smreczynskii</i> Cmol. | Czechia, Bohemia C., Kostelec nad Labem, Havlíčkova 1117, 11.06.2022, P. Jansa lgt., Oklep                | <i>Ligustrum vulgare</i> L.        |  |  |
| 6432 | <i>Otiorhynchus smreczynskii</i> Cmol. | Czechia, Bohemia C., Kostelec nad Labem, Havlíčkova 1117, 11.06.2022, P. Jansa lgt., Oklep                | <i>Ligustrum vulgare</i> L.        |  |  |
| 6433 | <i>Otiorhynchus smreczynskii</i> Cmol. | Czechia, Bohemia C., Kostelec nad Labem, Havlíčkova 1117, 11.06.2022, P. Jansa lgt., Oklep                | <i>Ligustrum vulgare</i> L.        |  |  |
| 6434 | <i>Otiorhynchus smreczynskii</i> Cmol. | Czechia, Bohemia c. 5752, Libiš - okoli čarpací stanice na Pražské ulici 30.05.2022, P. Jansa lgt., Oklep | <i>Ligustrum vulgare</i> L.        |  |  |
| 6435 | <i>Otiorhynchus smreczynskii</i> Cmol. | Czechia, Bohemia c. 5752, Libiš - okoli čarpací stanice na Pražské ulici 30.05.2022, P. Jansa lgt., Oklep | <i>Ligustrum vulgare</i> L.        |  |  |
| 6436 | <i>Otiorhynchus smreczynskii</i> Cmol. | Czechia, Bohemia c. 5752, Libiš - okoli čarpací stanice na Pražské ulici 30.05.2022, P. Jansa lgt., Oklep | <i>Ligustrum vulgare</i> L.        |  |  |
| 6437 | <i>Otiorhynchus smreczynskii</i> Cmol. | Czechia, Bohemia c. 5752, Libiš - okoli čarpací stanice na Pražské ulici 30.05.2022, P. Jansa lgt., Oklep | <i>Ligustrum vulgare</i> L.        |  |  |
| 6438 | <i>Otiorhynchus smreczynskii</i> Cmol. | Germany, Hannover bug., Le de buvg. 9.07.2022, lgt. P. Sprick                                             | <i>Ligustrum ovalifolium</i> Hassk |  |  |
| 6439 | <i>Otiorhynchus smreczynskii</i> Cmol. | Germany, Neu bleyen (Klistrain), 13.08.2022, lgt. P. Sprick                                               | <i>Ligustrum ovalifolium</i> Hassk |  |  |
| 6440 | <i>Otiorhynchus smreczynskii</i> Cmol. | Germany, Hannover, Steintosmasch, 9.07.2022, lgt. P. Sprick                                               | <i>Ligustrum ovalifolium</i> Hassk |  |  |
| 6441 | <i>Otiorhynchus smreczynskii</i> Cmol. | Germany, Kirstil Keitz, Rosch strg 3c, 13.08.2022, lgt. P. Sprick                                         | <i>Syringa vulgaris</i> L.         |  |  |
| 6442 | <i>Otiorhynchus smreczynskii</i> Cmol. | Germany, Neubleien, Cklistrin kelb. 13.08.2022, lgt. P. Sprick                                            | <i>Syringa vulgaris</i> L.         |  |  |
| 6443 | <i>Otiorhynchus smreczynskii</i> Cmol. | Germany, Klistrin-Kietz, W, Bahnhof, 13.08.2022, lgt. P. Sprick                                           | <i>Syringa vulgaris</i> L.         |  |  |
| 6444 | <i>Otiorhynchus smreczynskii</i> Cmol. | Germany, Hannover-Burg, Lederburg, 9.07.2022, lgt. P. Sprick                                              | <i>Syringa vulgaris</i> L.         |  |  |
| 6445 | <i>Otiorhynchus smreczynskii</i> Cmol. | Germany, Klistrin-Kietz, Wilhelm strasse 3c, 13.08.2022 lgt. P. Sprick                                    | <i>Syringa vulgaris</i> L.         |  |  |
| 6446 | <i>Otiorhynchus smreczynskii</i> Cmol. | Poland, Lublin, Dunikowskiego, N51.21839, E22.57170, 24.05.2022, lgt. R. Gosik                            | <i>Ligustrum vulgare</i> L.        |  |  |
| 6447 | <i>Otiorhynchus smreczynskii</i> Cmol. | Poland, Lublin, Dunikowskiego, N51.21839, E22.57170, 24.05.2022, lgt. R. Gosik                            | <i>Ligustrum vulgare</i> L.        |  |  |
| 6448 | <i>Otiorhynchus smreczynskii</i> Cmol. | Poland, Lublin, Dunikowskiego, N51.21839, E22.57170, 24.05.2022, lgt. R. Gosik                            | <i>Ligustrum vulgare</i> L.        |  |  |
| 6449 | <i>Otiorhynchus smreczynskii</i> Cmol. | Poland, Lublin, Dunikowskiego, N51.21839, E22.57170, 24.05.2022, lgt. R. Gosik                            | <i>Ligustrum vulgare</i> L.        |  |  |
| 6450 | <i>Otiorhynchus smreczynskii</i> Cmol. | Poland, Lublin, Dunikowskiego, N51.21839, E22.57170, 24.05.2022, lgt. R. Gosik                            | <i>Ligustrum vulgare</i> L.        |  |  |
| 6451 | <i>Otiorhynchus smreczynskii</i> Cmol. | Poland, Lublin, Dunikowskiego, N51.21839E, E22.57170, 24.05.2022, lgt. R. Gosik                           | <i>Ligustrum vulgare</i> L.        |  |  |
| 6452 | <i>Otiorhynchus smreczynskii</i> Cmol. | Poland, Warszawa, Połczyńska, N52.22142, E20.91870, 9.06.2022, lgt. R. Gosik                              | <i>Ligustrum vulgare</i> L.        |  |  |

|      |                                        |                                                                              |                             |                    |   |
|------|----------------------------------------|------------------------------------------------------------------------------|-----------------------------|--------------------|---|
| 6453 | <i>Otiorhynchus smreczynskii</i> Cmol. | Poland, Warszawa, Połczyńska, N52.22142, E20.91870, 9.06.2022, lgt. R. Gosik | <i>Ligustrum vulgare</i> L. |                    |   |
| 6454 | <i>Otiorhynchus smreczynskii</i> Cmol. | Poland, Warszawa, Połczyńska, N52.22142, E20.91870, 9.06.2022, lgt. R. Gosik | <i>Ligustrum vulgare</i> L. |                    |   |
| 6455 | <i>Otiorhynchus smreczynskii</i> Cmol. | Poland, Warszawa, Połczyńska, N52.22142, E20.91870, 9.06.2022, lgt. R. Gosik | <i>Ligustrum vulgare</i> L. |                    |   |
| 6456 | <i>Otiorhynchus smreczynskii</i> Cmol. | Poland, Warszawa, Połczyńska, N52.22142, E20.91870, 9.06.2022, lgt. R. Gosik | <i>Ligustrum vulgare</i> L. |                    |   |
| 6457 | <i>Otiorhynchus smreczynskii</i> Cmol. | Poland, Warszawa, Połczyńska, N52.22142, E20.91870, 9.06.2022, lgt. R. Gosik | <i>Ligustrum vulgare</i> L. |                    |   |
| 6458 | <i>Otiorhynchus smreczynskii</i> Cmol. | Poland, Kraków, Szlak, N50.07145, E19.93854, 23.06.2022, lgt. R. Gosik       | <i>Ligustrum vulgare</i> L. |                    |   |
| 6459 | <i>Otiorhynchus smreczynskii</i> Cmol. | Poland, Kraków, Szlak, N50.07145, E19.93854, 23.06.2022, lgt. R. Gosik       | <i>Ligustrum vulgare</i> L. |                    |   |
| 6460 | <i>Otiorhynchus smreczynskii</i> Cmol. | Poland, Kraków, Szlak, N50.07145, E19.93854, 23.06.2022, lgt. R. Gosik       | <i>Ligustrum vulgare</i> L. |                    |   |
| 6461 | <i>Otiorhynchus smreczynskii</i> Cmol. | Poland, Kraków, Szlak, N50.07145, E19.93854, 23.06.2022, lgt. R. Gosik       | <i>Ligustrum vulgare</i> L. |                    |   |
| 6462 | <i>Otiorhynchus smreczynskii</i> Cmol. | Poland, Kraków, Szlak, N50.07145, E19.93854, 23.06.2022, lgt. R. Gosik       | <i>Ligustrum vulgare</i> L. |                    |   |
| 6463 | <i>Otiorhynchus smreczynskii</i> Cmol. | Poland, Kraków, Szlak, N50.07145, E19.93854, 23.06.2022, lgt. R. Gosik       | <i>Ligustrum vulgare</i> L. |                    |   |
| 6470 | <i>Otiorhynchus smreczynskii</i> Cmol. | Poland, Rucione-Nida, N53.63993, E21.54440, 2.07.2022, lgt. R. Gosik         | <i>Ligustrum vulgare</i> L. |                    |   |
| 6471 | <i>Otiorhynchus smreczynskii</i> Cmol. | Poland, Kraków, Prądnik, N50.09283, E19.97604, 23.06.2022, lgt. R. Gosik     | <i>Syringa vulgaris</i> L.  |                    |   |
| 6472 | <i>Otiorhynchus smreczynskii</i> Cmol. | Poland, Kraków, Prądnik, N50.09283, E19.97604, 23.06.2022, lgt. R. Gosik     | <i>Syringa vulgaris</i> L.  |                    |   |
| 6473 | <i>Otiorhynchus smreczynskii</i> Cmol. | Poland, Kraków, Prądnik, N50.09283, E19.97604, 23.06.2022, lgt. R. Gosik     | <i>Syringa vulgaris</i> L.  |                    |   |
| 6464 | <i>Otiorhynchus rotundus</i> Marsh.    | Poland, Rucione-Nida, N53.63993, E21.54440, 2.07.2022, lgt. R. Gosik         | <i>Ligustrum vulgare</i> L. | rot1<br>(OQ382849) | 6 |
| 6465 | <i>Otiorhynchus rotundus</i> Marsh.    | Poland, Rucione-Nida, N53.63993, E21.54440, 2.07.2022, lgt. R. Gosik         | <i>Ligustrum vulgare</i> L. |                    |   |
| 6466 | <i>Otiorhynchus rotundus</i> Marsh.    | Poland, Rucione-Nida, N53.63993, E21.54440, 2.07.2022, lgt. R. Gosik         | <i>Ligustrum vulgare</i> L. |                    |   |
| 6467 | <i>Otiorhynchus rotundus</i> Marsh.    | Poland, Rucione-Nida, N53.63993, E21.54440, 2.07.2022, lgt. R. Gosik         | <i>Ligustrum vulgare</i> L. |                    |   |
| 6468 | <i>Otiorhynchus rotundus</i> Marsh.    | Poland, Rucione-Nida, N53.63993, E21.54440, 2.07.2022, lgt. R. Gosik         | <i>Ligustrum vulgare</i> L. |                    |   |
| 6469 | <i>Otiorhynchus rotundus</i> Marsh.    | Poland, Rucione-Nida, N53.63993, E21.54440, 2.07.2022, lgt. R. Gosik         | <i>Ligustrum vulgare</i> L. |                    |   |
| 6474 | <i>Otiorhynchus rotundus</i> Marsh.    | Poland, Gródek, N50.80711, E23.95661, 27.05.2022, lgt. R. Gosik              | <i>Syringa vulgaris</i> L.  | rot2<br>(OQ382850) | 6 |
| 6475 | <i>Otiorhynchus rotundus</i> Marsh.    | Poland, Gródek, N50.80711, E23.95661, 27.05.2022, lgt. R. Gosik              | <i>Syringa vulgaris</i> L.  |                    |   |
| 6476 | <i>Otiorhynchus rotundus</i> Marsh.    | Poland, Gródek, N50.80711, E23.95661, 27.05.2022, lgt. R. Gosik              | <i>Syringa vulgaris</i> L.  |                    |   |
| 6477 | <i>Otiorhynchus rotundus</i> Marsh.    | Poland, Gródek, N50.80711, E23.95661, 27.05.2022, lgt. R. Gosik              | <i>Syringa vulgaris</i> L.  |                    |   |
| 6478 | <i>Otiorhynchus</i>                    | Poland, Gródek, N50.80711,                                                   | <i>Syringa vulgaris</i> L.  |                    |   |

|      |                                               |                                                                    |                            |  |  |
|------|-----------------------------------------------|--------------------------------------------------------------------|----------------------------|--|--|
|      | <i>rotundus</i> Marsh.                        | E23.95661, 27.05.2022, lgt. R. Gosik                               |                            |  |  |
| 6479 | <i>Otiorhynchus</i><br><i>rotundus</i> Marsh. | Poland, Gródek, N50.80711,<br>E23.95661, 27.05.2022, lgt. R. Gosik | <i>Syringa vulgaris</i> L. |  |  |
